# Supplementary material for: Novel Inositol 1,4,5-Trisphosphate Receptor Inhibitor Antagonizes Hepatic Stellate Cell Activation: A Potential Drug to Treat Liver Fibrosis
Source: MDPI journal article supplement (doi:10.3390/cells13090765), 2024-04-30
Supplement: s1 [file s1]

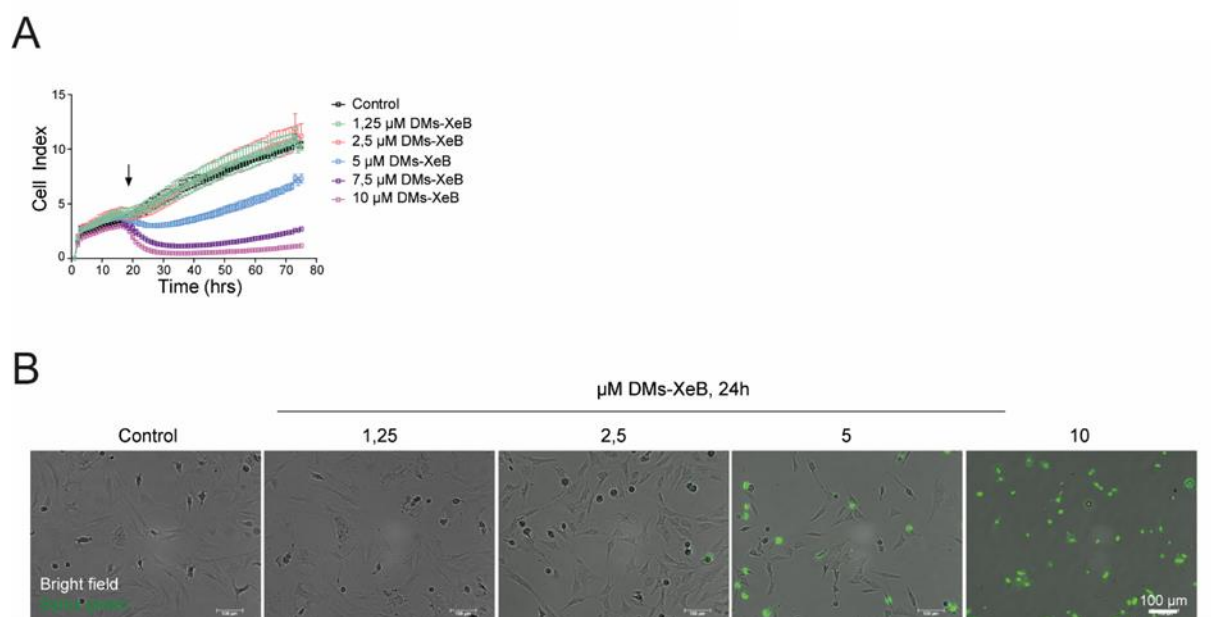

**Supplementary Figure S1: Toxicity of dmXeB to primary rat HSC:** (a) Proliferation rate of activated hepatic stellate cells during treatment with 0-10  $\mu\text{M}$  dmXeB for 72h. Arrow represents the start of treatment. (b) Bright field (in grey) and sytox green (in green) after 72h of dmXeB treatment.  $n=3$ . Bar= 100  $\mu\text{m}$ .

## Tables

**Table S1: List of primers and probes used.** Gene, probe sequence, forward and reverse primer sequence, and species listed for each of the genes used.

| Gene          | Probe Sequence                 | Forward primer         | Reverse primer         | Species   |
|---------------|--------------------------------|------------------------|------------------------|-----------|
| <b>acta2</b>  | CTTCACACATAGCTGGAGCAGCTTCTCGA  | GCCAGTCGCCATCAGGAAC    | CACACCAGAGCTGTGCTGTCTT | Rat       |
| <b>col1a1</b> | TCCTGCTGGTCCCCGAGGAAACA        | TGGTGAACGTGGTGTACAAGGT | CAGTATCACCCCTTGGCACCAT | Rat       |
| <b>ACTA2</b>  | CACTCTTTCTACAATGAGCTTCGTGTTGCC | GGGACGACATGGAAAAGATCTG | CAGGGTGGGATGCTCTTCA    | Human     |
| <b>COL1A1</b> | CCCCAAGGACAAGAGGCATGTCTG       | GGCCCAGAAGAACTGGTACATC | CCGCCATACTCGAACTGGAA   | Human     |
| <b>18S</b>    | CGCGCAAATTACCCACTCCCGA         | CGGCTACCACATCCAAGGA    | CCAATTACAGGCCTCGAAA    | Rat/human |
